# Supplementary material for: Understanding the R882H mutation effects of DNA methyltransferase DNMT3A: a combination of molecular dynamics simulations and QM/MM calculations
Source: Royal Society of Chemistry journal article supplement (doi:10.1039/c9ra06791d), 2019-01-01
Supplement: c9ra06791d1.pdf [file c9ra06791d1.pdf]

# **Understand R882H mutation effect of DNA methyltransferase DNMT3A: a combination of molecular dynamics simulation and QM/MM calculation**

Lanxuan Liu,<sup>1</sup> Ting Shi,<sup>1</sup> Kendall N. Houk,<sup>2</sup> Yi-Lei Zhao\*<sup>1,2</sup>

*<sup>1</sup>State Key Laboratory of Microbial Metabolism, Joint International Research Laboratory of  
Metabolic and Developmental Sciences, School of Life Sciences and Biotechnology, Shanghai  
Jiao Tong University, Shanghai 200240, China*

*<sup>2</sup>Department of Chemistry and Biochemistry, University of California, Los Angeles,  
California, USA.*

\*To whom correspondence should be addressed:

**Prof. Yi-Lei Zhao**

School of Life Sciences and Biotechnology

Shanghai Jiao Tong University

800 Dongchuan Road, Shanghai 200240, China

Tel/Fax: +86-21-34207190;

Email: yileizhao@sjtu.edu.cn

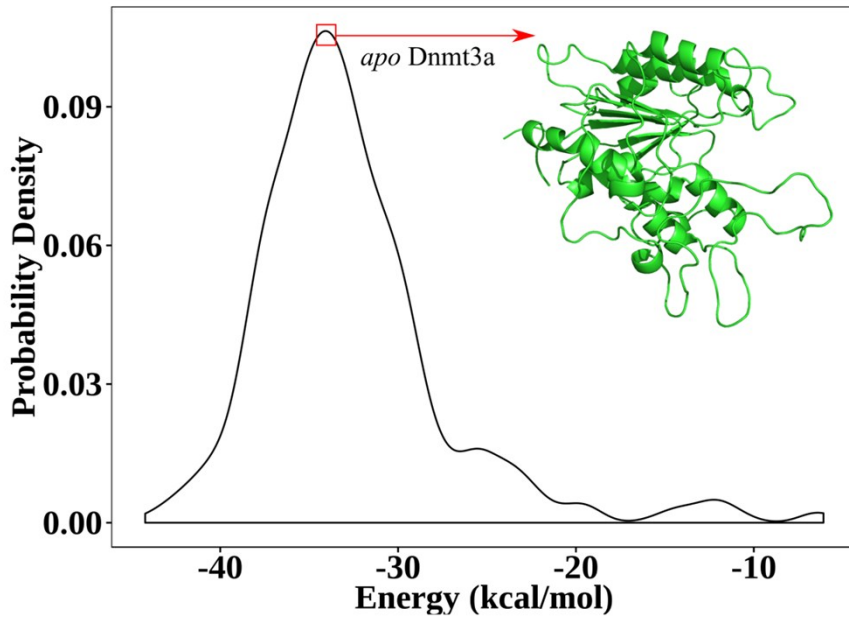

**Fig. S1** *WT-apo* DNMT3A modeled by Rosetta.

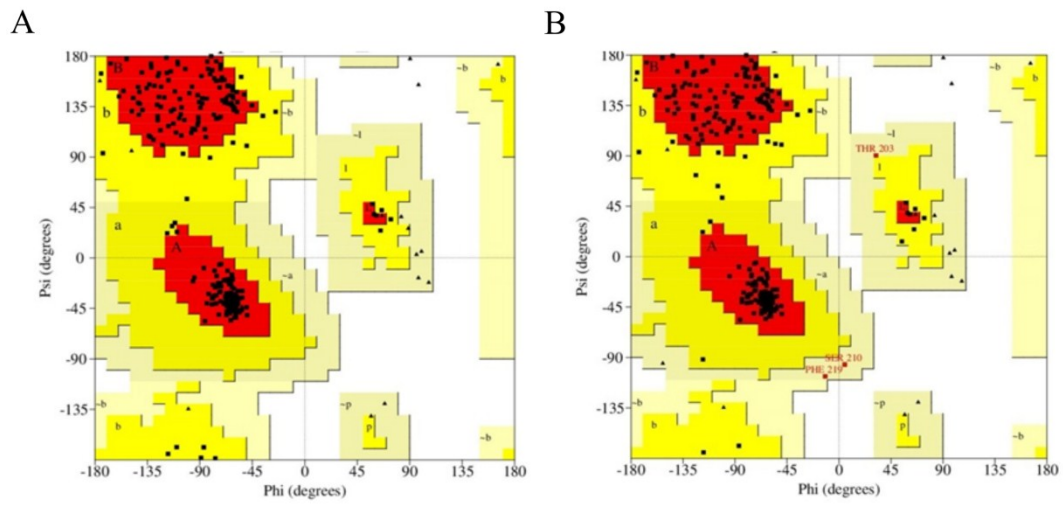

**Fig. S2** Ramachandran plot of homology A) *apo-* and B) *holo-* DNMT3A model.

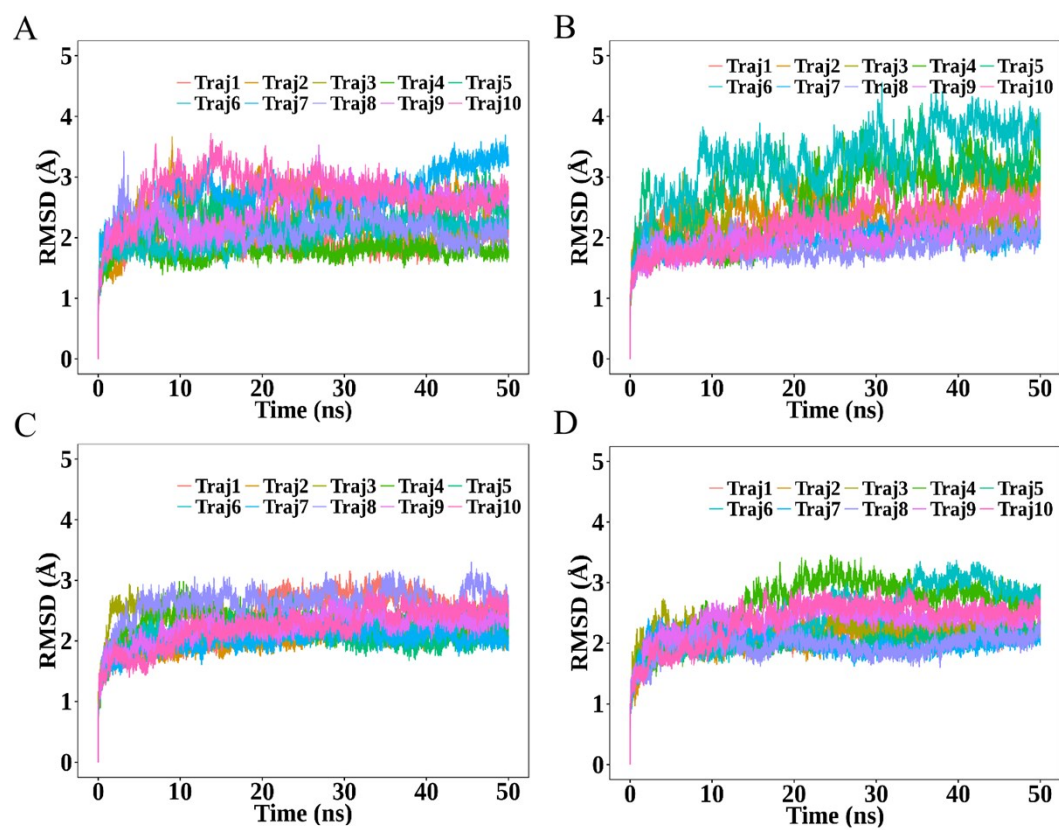

**Fig. S3** RMSD values of A) *WT-apo*, B) *Mut-apo*, C) *WT-holo* and D) *Mut-holo* DNMT3A (homology model).

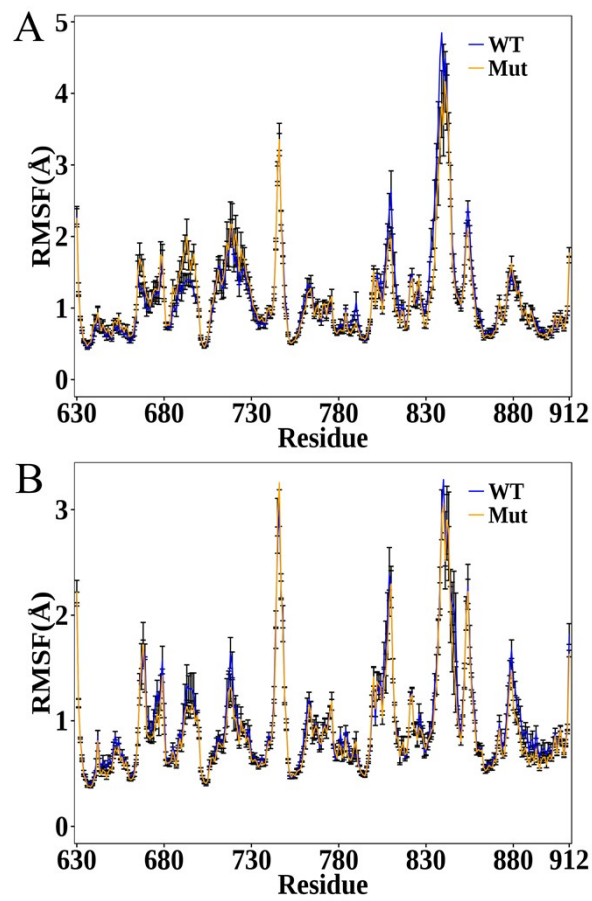

**Fig. S4** Fluctuations between homology WT and R882H-mutated of A) *apo*-DNMT3A, B) *holo*-DNMT3A.

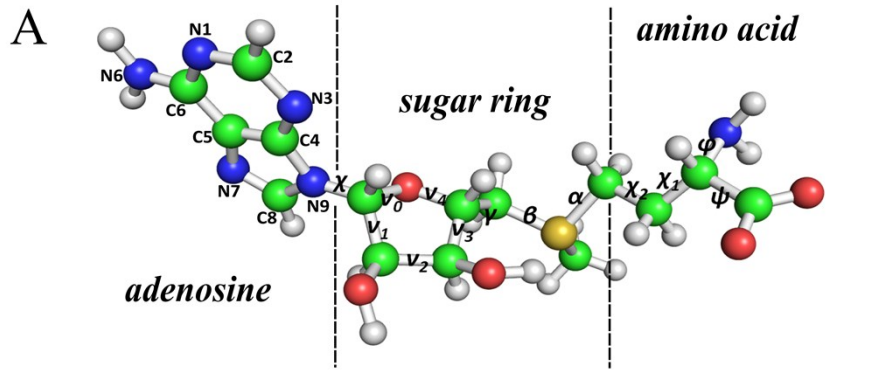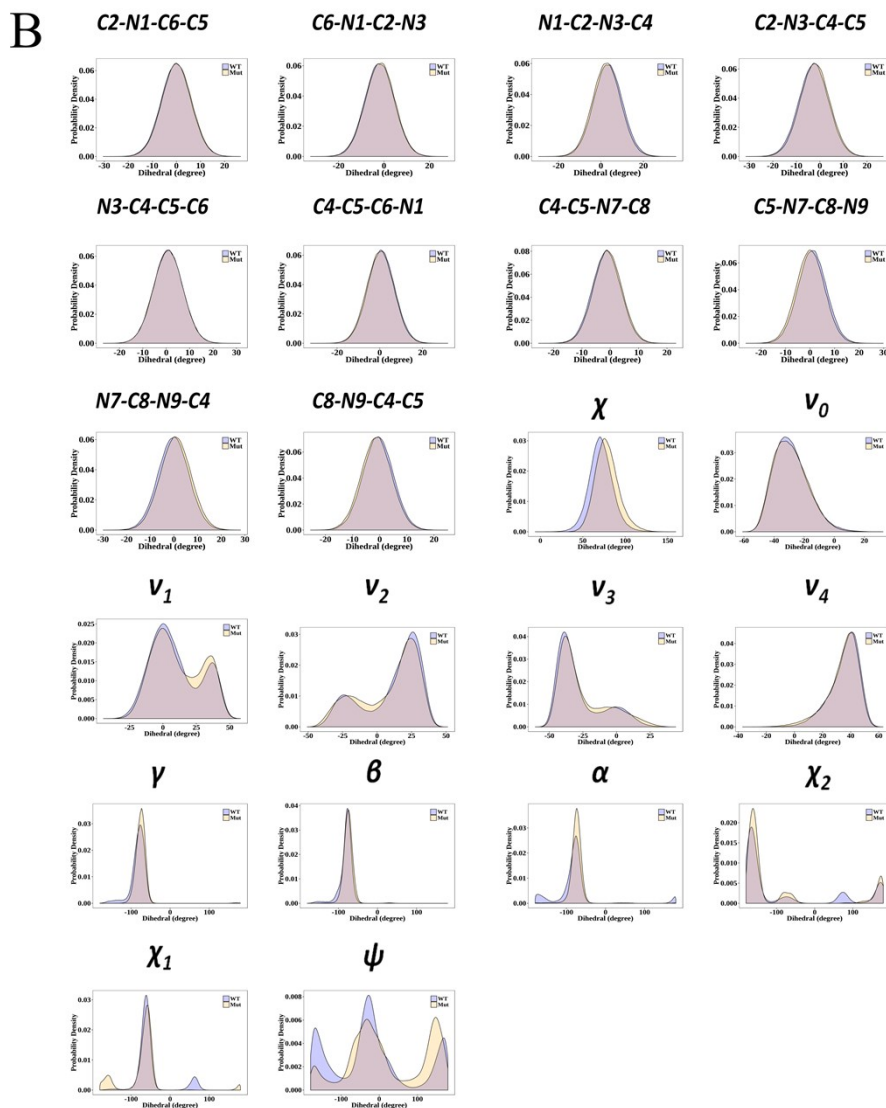

**Fig. S5** Conformational analysis of cofactor SAM of homology *holo*-DNMT3As. A) structural partition and dihedral definition and B) population distributions of dihedral angles of the concatenated cMD trajectories.

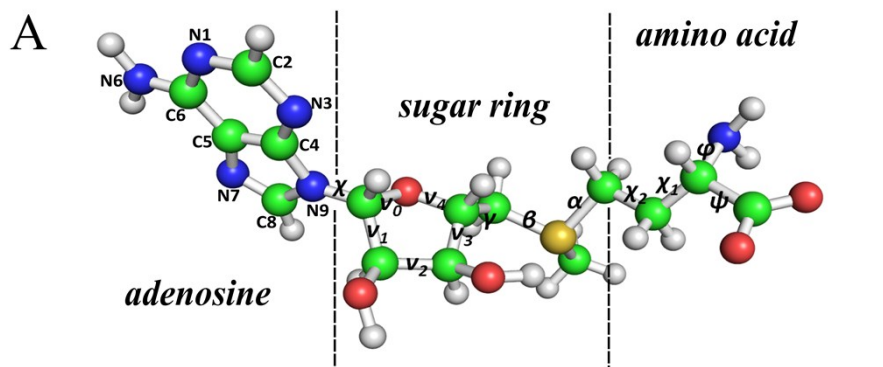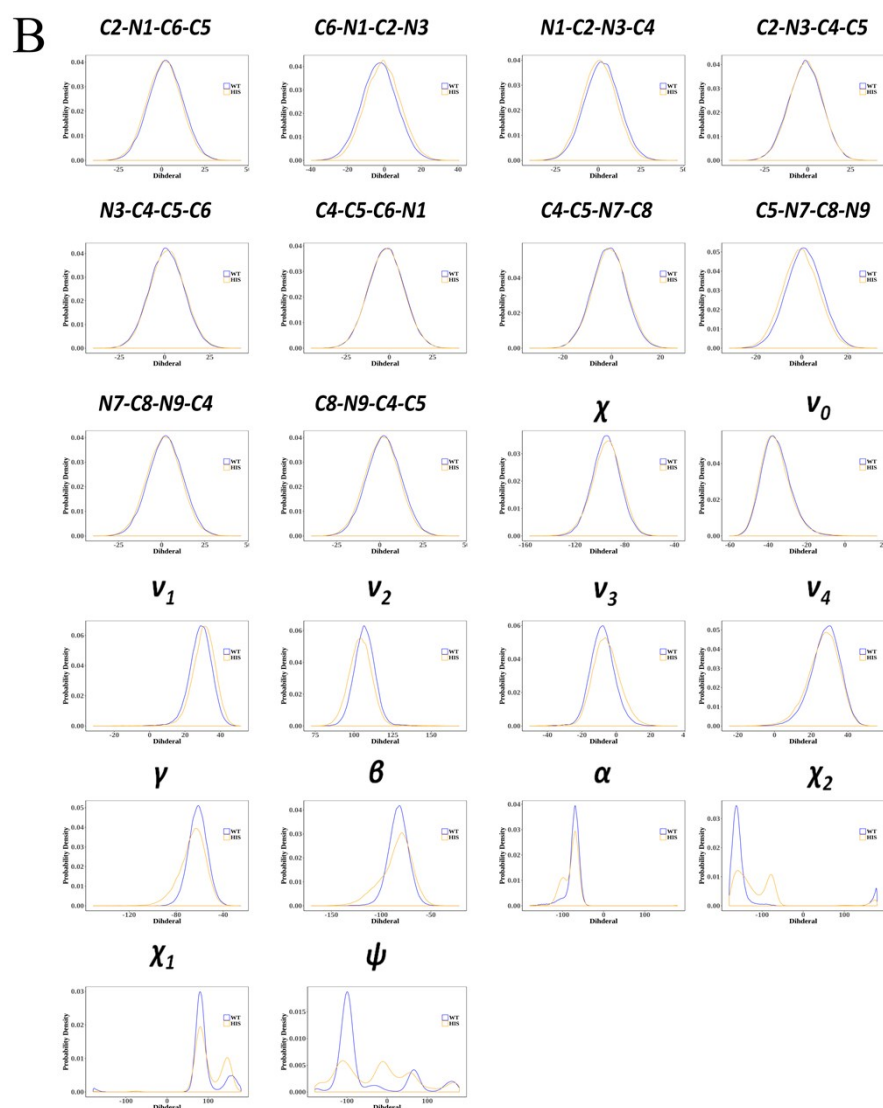

**Fig. S6** Conformational analysis of cofactor SAM of crystal *holo*-DNMT3As. A) structural partition and dihedral definition and B) population distributions of dihedral angles of the accelerated aMD trajectories.

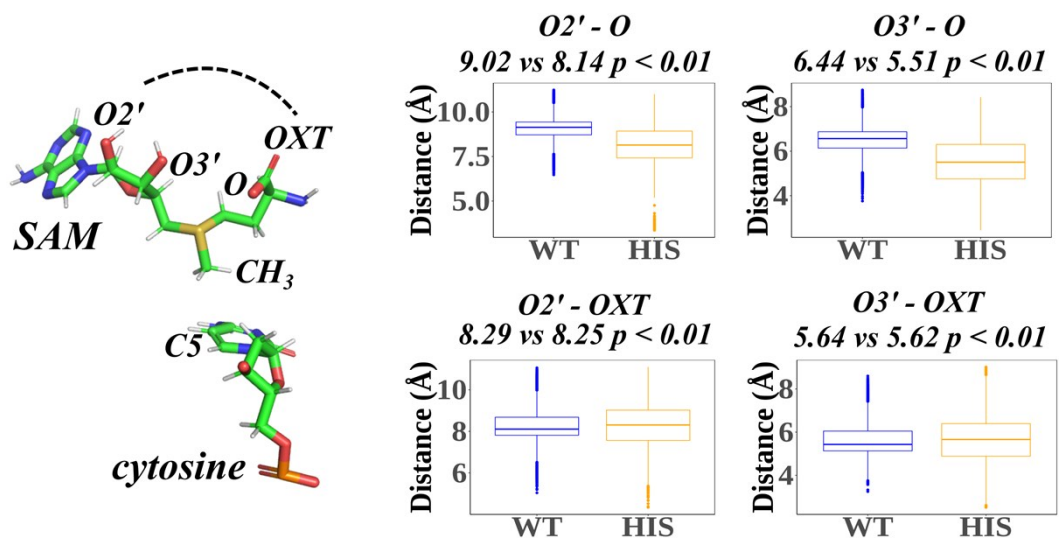

**Fig. S7** Statistical comparison of the distance between oxygen atoms of the hydroxyl on the ribose ring and the oxygen atoms on the amino acid terminal portion of SAM in crystal DNMT3A *holo*-models.

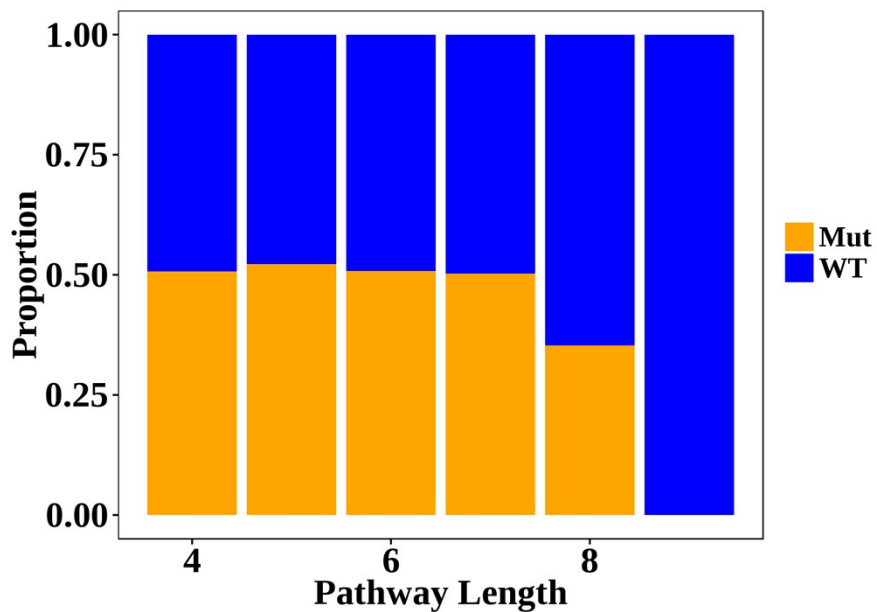

**Fig. S8** Pathway length distribution from mutational site Arg882/His882 to Arg891 in homology *holo*-models.



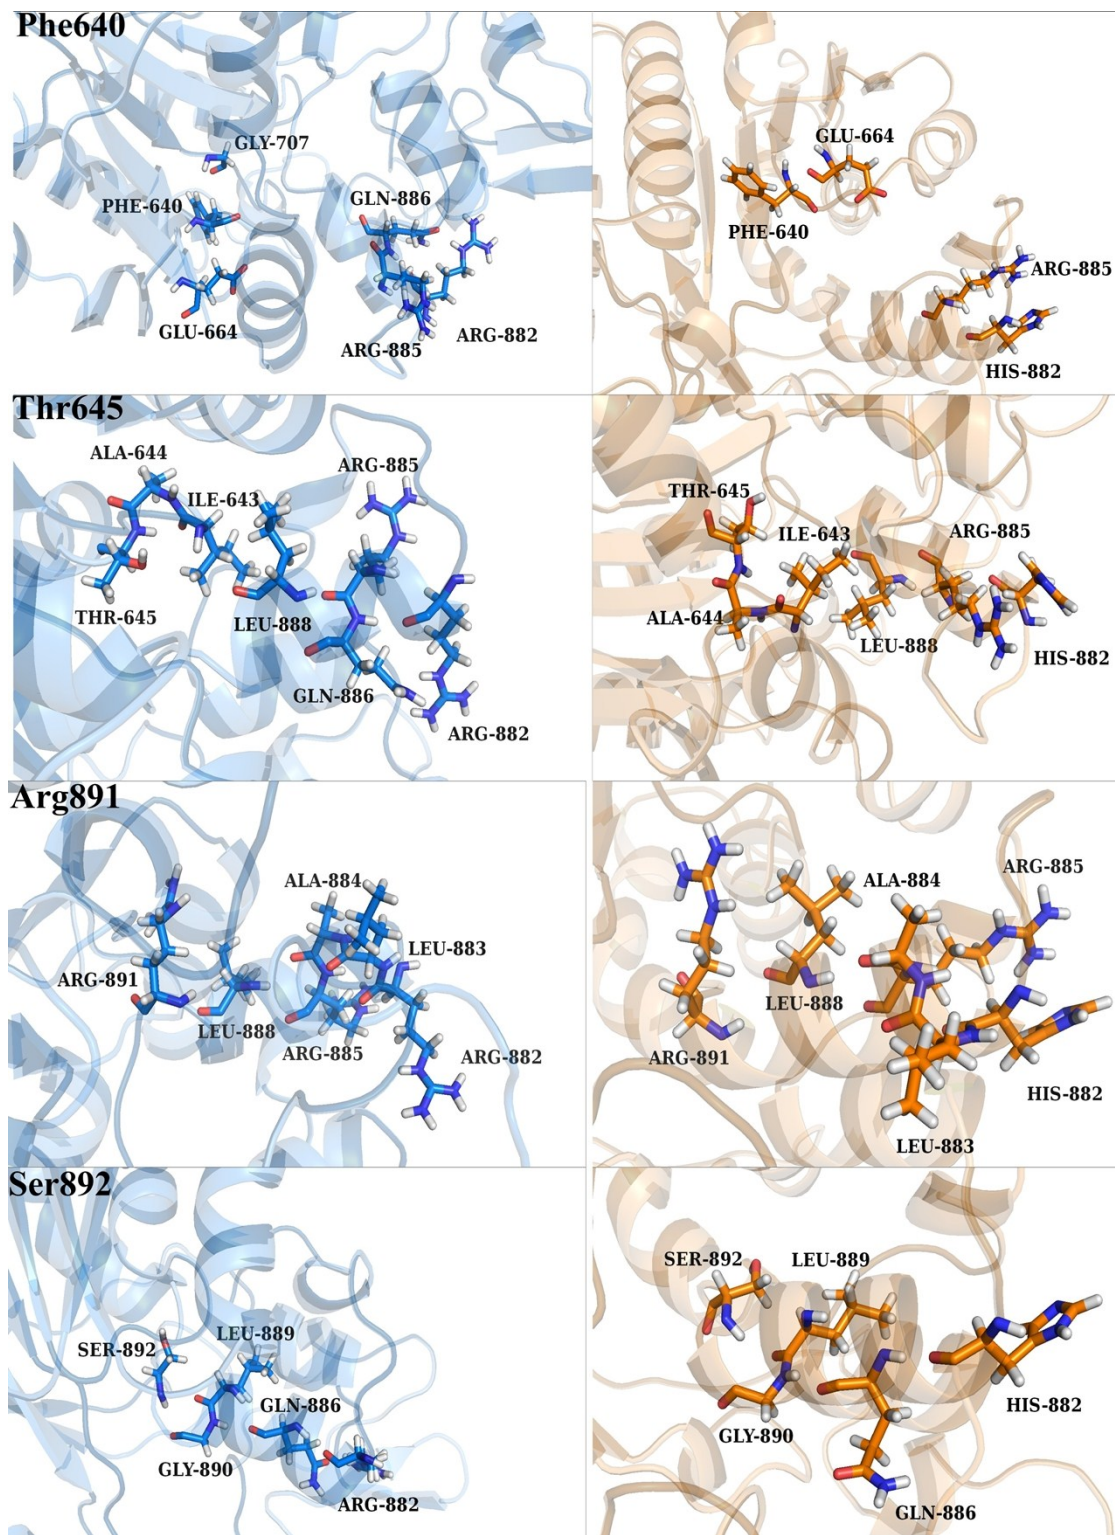

**Fig. S9** Most probable pathway from the mutational site Arg/His882 to Phe640, Thr645, Arg891, and Ser892 for homology *apo*-DNMT3A.



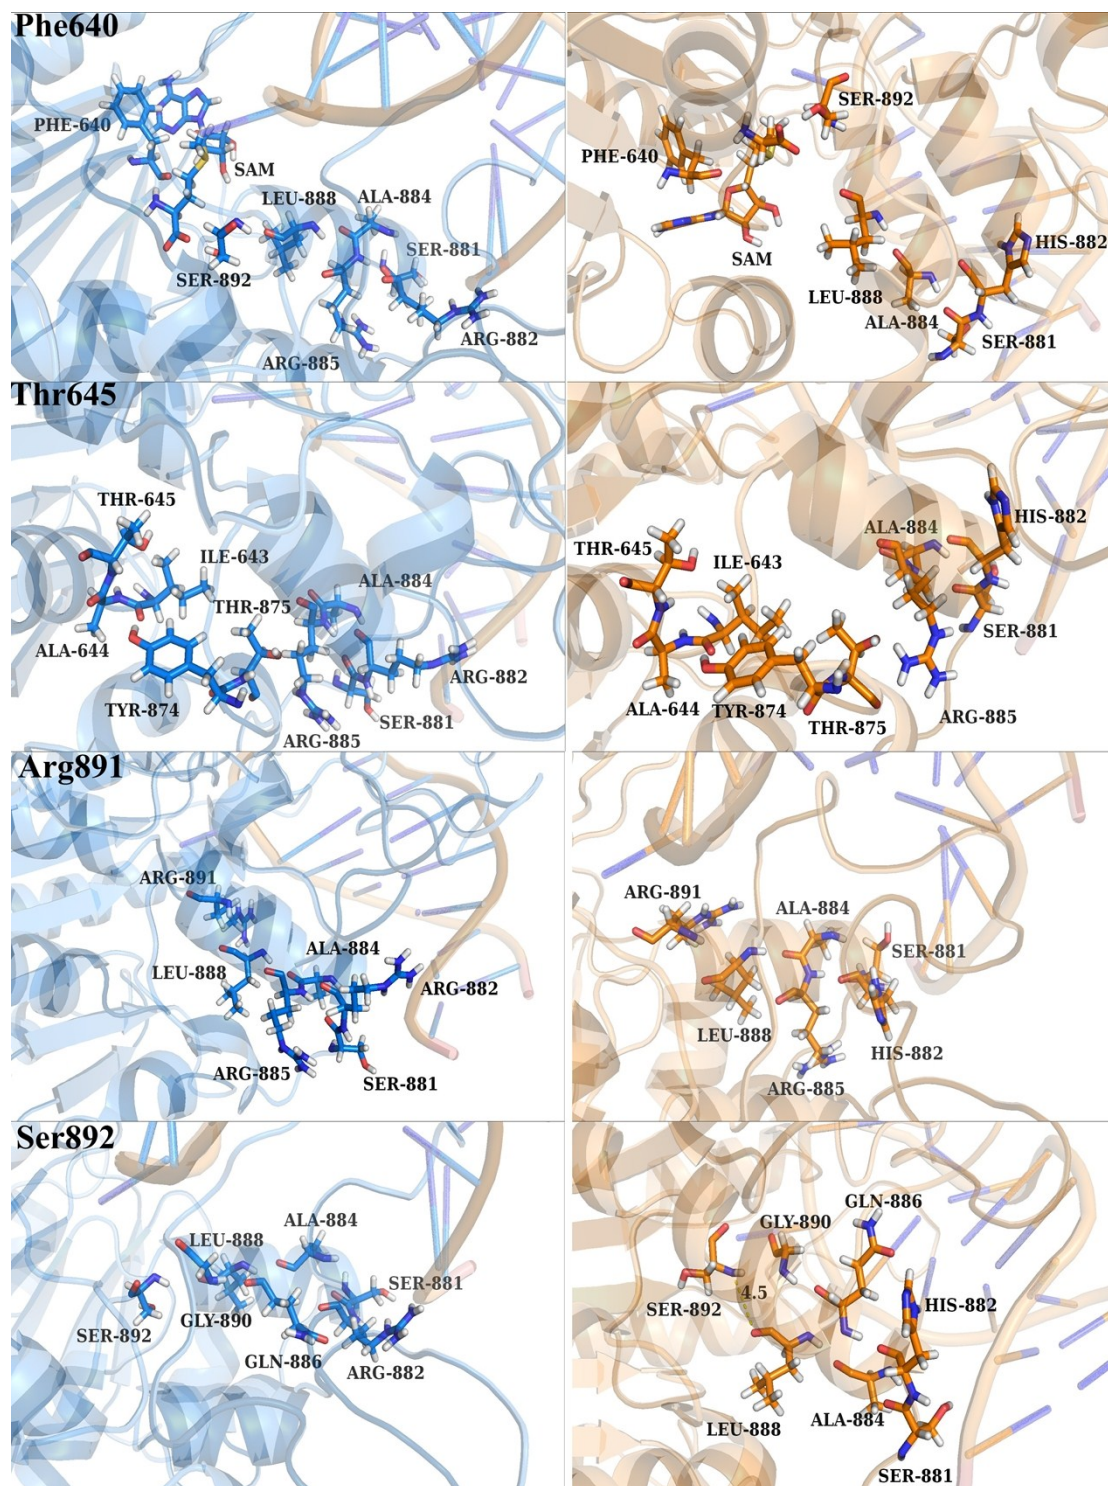

**Fig. S10** Most probable pathway from the mutational site Arg/His882 to Phe640, Thr645, Arg891, and Ser892 for homology *holo*-DNMT3A.

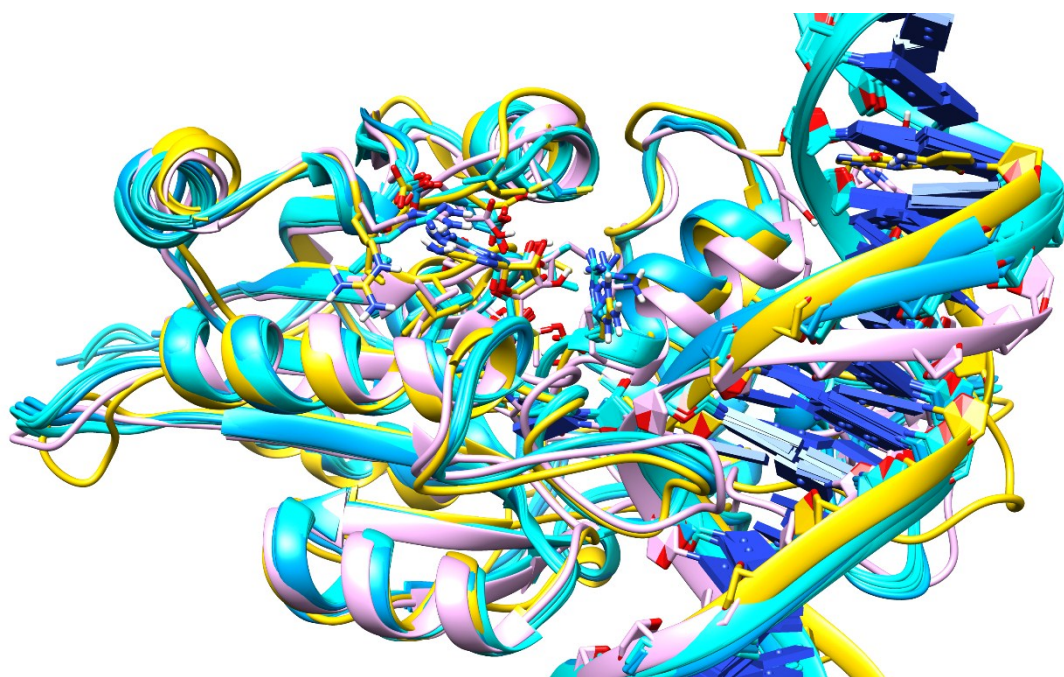

**Fig. S11.** The structural alignment of the crystal structures (PDB#: 5YX2, 6BRR, and 6F57), and the calculated least-RMSD snapshot to the average structure. Blue: the six holo complexes from the crystal structures, copper: the holo-model of WT, purple: the holo-model of R882H.

**Table S1** Binding free energies between DNMT3A and cofactor SAM of multiple cMD trajectories (Unit = kcal/mol)

| WT-holo    |        |        |        |        |        |        |        |        |        |        |        |       |      |
|------------|--------|--------|--------|--------|--------|--------|--------|--------|--------|--------|--------|-------|------|
| Energy     | Traj1  | Traj2  | Traj3  | Traj4  | Traj5  | Traj6  | Traj7  | Traj8  | Traj9  | Traj10 | Mean   | SD    | SE   |
| Evdw       | -44.60 | -53.86 | -50.55 | -49.69 | -42.01 | -52.43 | -49.34 | -47.49 | -50.12 | -49.41 | -48.95 | 3.50  | 1.11 |
| Eele       | -69.96 | -66.84 | -65.12 | -73.76 | -73.16 | -60.63 | -73.22 | -55.72 | -64.00 | -57.03 | -65.94 | 6.66  | 2.11 |
| Egb        | 77.47  | 69.36  | 76.66  | 82.11  | 77.92  | 65.52  | 84.07  | 71.90  | 72.82  | 71.35  | 74.92  | 5.77  | 1.82 |
| Esurf      | -5.35  | -6.29  | -6.73  | -6.24  | -5.05  | -6.13  | -6.31  | -5.70  | -6.41  | -6.20  | -6.04  | 0.52  | 0.16 |
| $\Delta H$ | -42.44 | -57.64 | -50.75 | -47.58 | -42.30 | -53.66 | -44.80 | -37.00 | -47.70 | -41.29 | -46.52 | 6.24  | 1.97 |
| $\Delta S$ | -26.97 | -30.08 | -28.97 | -29.93 | -27.40 | -28.37 | -33.96 | -26.67 | -27.88 | -29.46 | -28.97 | 2.12  | 0.67 |
| $\Delta G$ | -15.47 | -27.56 | -21.78 | -17.65 | -14.84 | -25.29 | -10.84 | -10.36 | -19.82 | -11.82 | -17.54 | 6.00  | 1.90 |
| Mut-holo   |        |        |        |        |        |        |        |        |        |        |        |       |      |
| Energy     | Traj1  | Traj2  | Traj3  | Traj4  | Traj5  | Traj6  | Traj7  | Traj8  | Traj9  | Traj10 | Mean   | SD    | SE   |
| Evdw       | -50.09 | -48.06 | -46.72 | -50.01 | -51.45 | -52.66 | -50.92 | -53.65 | -52.48 | -54.17 | -51.02 | 2.38  | 0.75 |
| Eele       | -70.41 | -51.78 | -62.60 | -63.99 | -66.96 | -64.67 | -62.36 | -41.40 | -75.57 | -74.94 | -63.47 | 10.36 | 3.28 |
| Egb        | 85.49  | 67.43  | 80.93  | 77.02  | 73.71  | 74.00  | 66.02  | 61.31  | 87.27  | 86.77  | 76.00  | 9.17  | 2.90 |
| Esurf      | -6.27  | -5.54  | -5.27  | -6.32  | -6.34  | -6.20  | -5.99  | -6.56  | -6.27  | -6.28  | -6.10  | 0.40  | 0.13 |
| $\Delta H$ | -41.28 | -37.94 | -33.67 | -43.30 | -51.03 | -49.54 | -53.24 | -40.30 | -47.05 | -48.62 | -44.60 | 6.30  | 1.99 |
| $\Delta S$ | -27.36 | -25.82 | -25.67 | -30.10 | -32.31 | -29.19 | -25.57 | -24.69 | -28.56 | -29.51 | -27.88 | 2.46  | 0.78 |
| $\Delta G$ | -13.91 | -12.13 | -8.00  | -13.20 | -18.72 | -20.35 | -27.67 | -15.61 | -18.49 | -19.12 | -16.72 | 5.42  | 1.71 |

**Table S2** Amino acid contributions of DNMT3A-SAM binding free energy  
(Unit=kcal/mol)

| Residue | WT- <i>holo</i> | Mut- <i>holo</i> |
|---------|-----------------|------------------|
| SAM     | -16.7±3.2       | -15.1±3.1        |
| Phe640  | -4.0±0.6        | -4.1±0.5         |
| Thr645  | -1.3±1.2        | -0.9±0.7         |
| Glu664  | -1.5±0.6        | -1.5±0.3         |
| Val665  | -2.9±0.6        | -2.7±0.5         |
| Asp686  | -3.8±0.7        | -4.5±0.8         |
| Arg891  | -0.9±2.0        | -0.8±0.8         |
| Ser892  | -2.1±1.4        | -2.5±0.5         |
| Trp893  | -2.8±0.9        | -2.9±1.4         |

**Table S3** Hydrogen bonding occupancy between residues of DNMT3A and SAM in  
all cMD and aMD trajectories

| Acceptor               | Donor                  | WT- <i>holo</i> | R882H- <i>holo</i> |
|------------------------|------------------------|-----------------|--------------------|
| Phe640@O               | SAM@N                  | 11.4%±3.4%      | 10.3%±3.6%         |
| SAM@OXT                | Thr645@O <sub>γ1</sub> | 34.8%±6.4%      | 27.2%±8.7%         |
| Asp686@O <sub>δ1</sub> | SAM@N6                 | 39.2%±6.9%      | 12.1%±5.7%         |
| Asp686@O <sub>δ2</sub> | SAM@N6                 | 15.3%±6.0%      | 41.1%±6.3%         |
| SAM@O3'                | Arg891@N <sub>ε</sub>  | 10.9%±7.4%      | 5.7%±3.0%          |
| SAM@O3'                | Arg891@N <sub>η2</sub> | 7.7%±5.5%       | 2.5%±1.8%          |
| SAM@O3'                | Arg891@N <sub>η1</sub> | 0.5%±0.4%       | 0.8%±0.5%          |
| SAM@O2'                | Arg891@N <sub>ε</sub>  | 0.2%±0.2%       | 0.1%±0.1%          |
| SAM@O2'                | Arg891@N <sub>η1</sub> | 0.5%±0.3%       | 0.0%±0.0%          |
| SAM@O2'                | Arg891@N <sub>η2</sub> | 7.2%±6.6%       | 2.9%±2.7%          |
| SAM@OXT                | Arg891@N <sub>ε</sub>  | 1.8%±1.8%       | 5.3%±3.2%          |
| SAM@OXT                | Arg891@N <sub>η1</sub> | 1.7%±1.0%       | 7.0%±5.4%          |

|         |                        |            |             |
|---------|------------------------|------------|-------------|
| SAM@OXT | Arg891@N <sub>η2</sub> | 0.4%±0.4%  | 0.5%±0.4%   |
| SAM@O   | Arg891@N <sub>ε</sub>  | 2.4%±2.1%  | 7.9%±5.1%   |
| SAM@O   | Arg891@N <sub>η1</sub> | 0.9%±0.9%  | 1.3%±1.2%   |
| SAM@O   | Arg891@N <sub>η2</sub> | 0.0%       | 1.1%±1.1%   |
| SAM@O   | Ser892@O <sub>γ</sub>  | 48.7%±9.9% | 61.2%±10.9% |
| SAM@OXT | Ser892@O <sub>γ</sub>  | 46.5%±8.6% | 53.6%±9.9%  |
| SAM@N   | Trp893@N <sub>ε1</sub> | 11.5%±4.3% | 5.9%±2.3%   |
| SAM@O   | Trp893@N <sub>ε1</sub> | 7.9%±5.3%  | 0.3%±0.2%   |
| SAM@OXT | Trp893@N <sub>ε1</sub> | 7.7%±5.5%  | 0.4%±0.3%   |
| SAM@N   | Trp893@N               | 1.8%±1.6%  | 12.9%±8.2%  |
| SAM@O   | Trp893@N               | 24.3%±7.0% | 20.2%±8.4%  |
| SAM@OXT | Trp893@N               | 14.2%±5.3% | 26.0%±10.3% |

(SAM@OXT represents the carboxyl oxygen, and SAM@O represents the carbonyl oxygen of the amino acid terminal of SAM; R882-*holo* is the representation of combining both Mut-*holo* of the homology model and HIS-*holo* of the crystal model)

**Table S4** Energy barriers calculated by the different combination of functional and basis set. (Unit = kcal/mol)

| Basis set  | M06-2X          |                  | ωB97x-D         |                  |
|------------|-----------------|------------------|-----------------|------------------|
|            | WT- <i>holo</i> | Mut- <i>holo</i> | WT- <i>holo</i> | Mut- <i>holo</i> |
| 6-31G(d)   | 16.0            | 19.1             | 18.8            | 22.5             |
| 6-311G(d)  | 17.4            | 19.8             | 19.8            | 23.0             |
| 6-311+G(d) | 18.7            | 20.1             | 21.2            | 23.3             |

**Table S5** Energies of different layers on PRS and TS compared to the reference (Unit = kcal/mol)

|                  | Layers   | PRS   | TS   |
|------------------|----------|-------|------|
| WT- <i>holo</i>  | QM layer | -15.1 | -4.5 |
|                  | MM layer | 2.7   | 7.0  |
| Mut- <i>holo</i> | QM layer | -20.0 | 1.0  |
|                  | MM layer | -2.3  | -7.7 |

**Table S6** Population comparison of near attack conformers (NAC) parameters

| Parameters            | <i>homology</i> |                  | <i>crystal</i>  |                  |
|-----------------------|-----------------|------------------|-----------------|------------------|
|                       | WT- <i>holo</i> | Mut- <i>holo</i> | WT- <i>holo</i> | HIS- <i>holo</i> |
| C4-C5-CH <sub>3</sub> | 33.1%           | 12.5%            | 56.5%           | 8.9%             |
| C6-C5-CH <sub>3</sub> | 63.4%           | 80.0%            | 75.2%           | 75.5%            |
| Both angles           | 23.8%           | 8.9%             | 44.5%           | 7.4%             |
| O4'-C1'-N1-C2         | 60.4%           | 61.1%            | 75.8%           | 70.4%            |

(Both angles represent those conformers that satisfy criteria of both C4-C5-CH<sub>3</sub> and C6-C5-CH<sub>3</sub>)

**Table S7** Center of mass distance between sidechains along the residues consisting of quasi-“Newton’s cradle” model on H11 helix (Unit = angstrom)

|                 | DNMT3A           | 882-883 | 883-887 | 887-891 |
|-----------------|------------------|---------|---------|---------|
| <i>homology</i> | WT- <i>holo</i>  | 8.0±1.2 | 5.8±1.8 | 7.8±2.1 |
|                 | Mut- <i>holo</i> | 7.2±0.9 | 5.2±1.2 | 8.2±1.7 |
| <i>crystal</i>  | WT- <i>holo</i>  | 5.5±0.5 | 6.0±0.8 | 6.4±0.8 |
|                 | HIS- <i>holo</i> | 5.6±0.4 | 5.5±0.8 | 7.2±0.7 |
